# Supplementary material for: The chemical functionalization of graphene nanoplatelets through solvent-free reaction
Source: Royal Society of Chemistry journal article supplement (doi:10.1039/c8ra04817g), 2018-01-01
Supplement: c8ra04817g1.pdf [file c8ra04817g1.pdf]

## Electronic supplementary information

### The chemical functionalization of graphene nanoplatelets through solvent-free reaction

Eunice Cunha<sup>1†</sup>, He Ren<sup>2</sup>, Fei Lin<sup>1</sup>, Ian A Kinloch<sup>1</sup>, Quanji Sun<sup>2</sup>, Zhaodong Fan<sup>2†</sup>, and Robert J Young<sup>1</sup>.

<sup>1</sup> National Graphene Institute and School of Materials, University of Manchester, Manchester M13 9PL, UK

<sup>2</sup> Beijing Institute of Aeronautical Materials (BIAM), Beijing, China

<sup>†</sup> Corresponding author: eunice.cunha-2@manchester.ac.uk

fanzhaodong99@sohu.com

Table S1: XPS atomic concentration and atomic ratio of the chemical elements on the pristine and functionalized HC11 at different temperature reactions

|            | At (%) |      |      | ratio   |         |         |
|------------|--------|------|------|---------|---------|---------|
|            | C      | N    | O    | [N]:[O] | [N]:[C] | [O]:[C] |
| HC11       | 98.35  | -    | 1.65 | -       | -       | 0.017   |
| f-HC11 180 | 87.32  | 5.00 | 7.68 | 0.65    | 0.057   | 0.088   |
| f-HC11 200 | 84.47  | 6.24 | 9.29 | 0.67    | 0.074   | 0.109   |
| f-HC11 220 | 84.75  | 6.77 | 8.48 | 0.80    | 0.079   | 0.100   |
| f-HC11 250 | 86.02  | 6.77 | 7.21 | 0.94    | 0.078   | 0.084   |

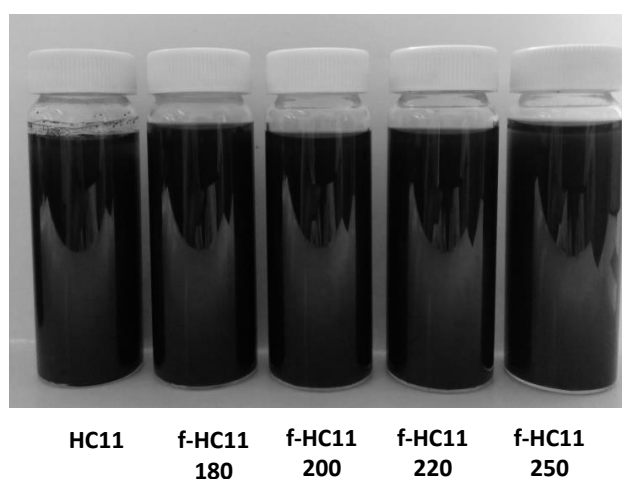

Figure S1: Water suspensions of the pristine and functionalized HC11

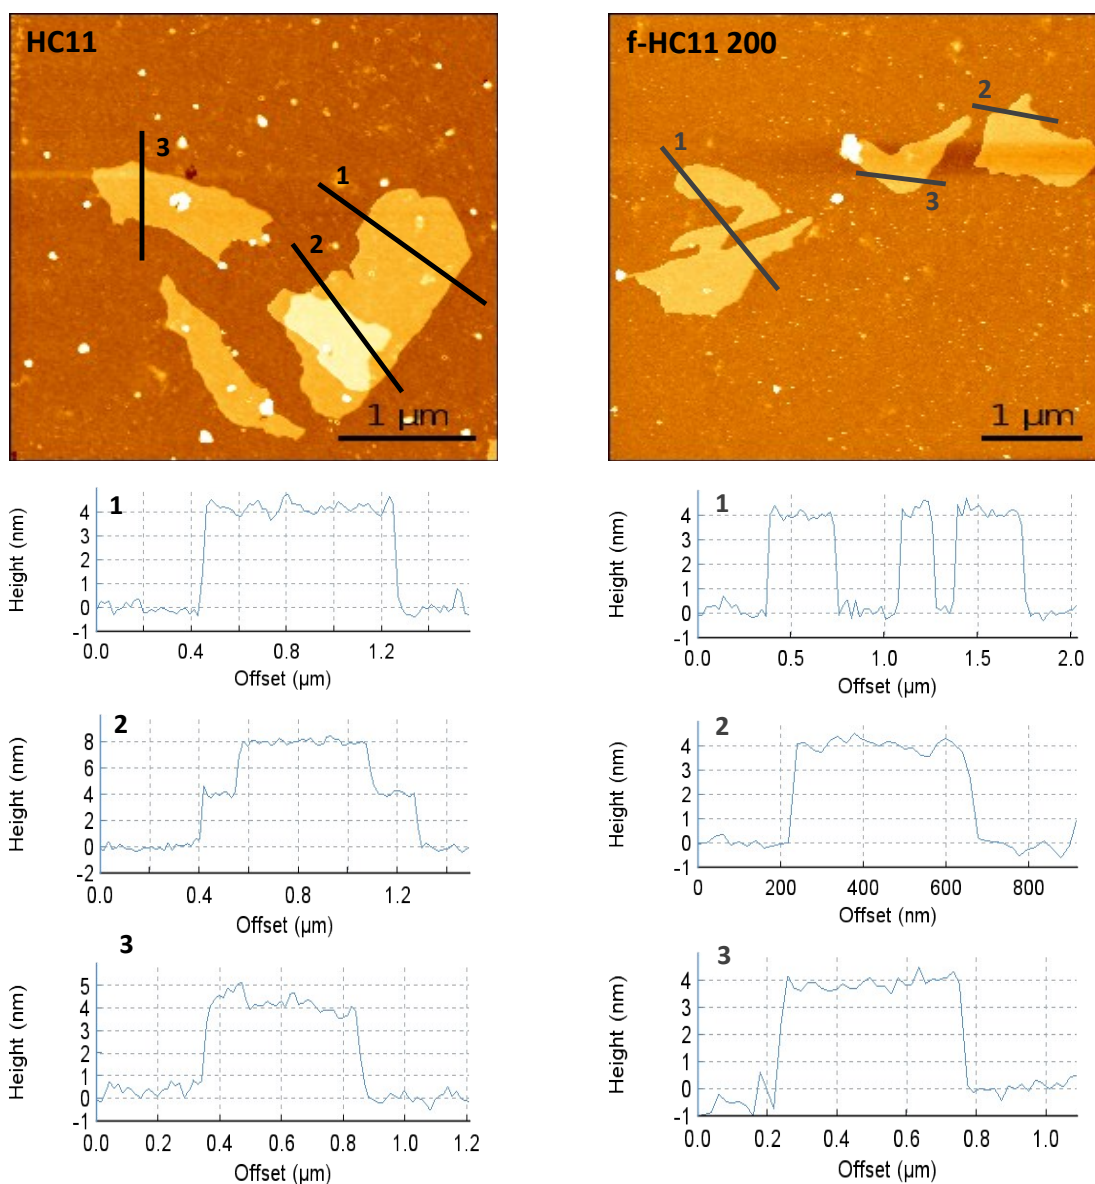

Figure S2: AFM images of the pristine HC11 and f-HC11 200 and the corresponding height profiles of the selected sections 1, 2 and 3.

Table S2: XPS atomic concentration and atomic ratio of the chemical elements on the pristine and functionalized HC11 at different GNP:IDA ratios.

|                | At (%) |      |       | ratio   |         |         |
|----------------|--------|------|-------|---------|---------|---------|
|                | C      | N    | O     | [N]:[O] | [N]:[C] | [O]:[C] |
| HC11           | 98.35  | -    | 1.65  | -       | -       | 0.017   |
| f-HC11 200-1.0 | 84.47  | 6.24 | 9.29  | 0.67    | 0.074   | 0.109   |
| f-HC11 200-1.5 | 81.24  | 8.05 | 10.71 | 0.75    | 0.099   | 0.132   |
| f-HC11 200-2.0 | 79.89  | 8.71 | 11.40 | 0.76    | 0.109   | 0.143   |
